# Supplementary material for: Phase evolution and fluorescence stability of CsPb2Br5 microwires and their application in stable and sensitive photodetectors
Source: Royal Society of Chemistry journal article supplement (doi:10.1039/d3tc00109a), 2023-01-01
Supplement: d3tc00109a1.pdf [file d3tc00109a1.pdf]

## Supporting Information:

Phase evolution and fluorescence stability of CsPb<sub>2</sub>Br<sub>5</sub> microwires and its application to stable and sensitive photodetectors

Ning Jiang<sup>a</sup>, Jinwei Wei<sup>a</sup>, Mingjie Lv<sup>a</sup>, Youzhuang Rong<sup>a</sup>, Changmin Wang<sup>a</sup>, Yao Liu<sup>a</sup>, Gongxiang Wei<sup>a</sup>, Xin Han<sup>b</sup>, Yuzhu Wang<sup>c</sup>, Yunyan Liu<sup>a\*</sup>, Huiqiang Liu<sup>a\*</sup>

<sup>a</sup> *School of Physics and Optoelectronic Engineering, Shandong University of Technology, Zibo, 255049, China.*

<sup>b</sup> *School of Agricultural Engineering and Food Science, Shandong University of Technology, Zibo, 255049, China*

<sup>c</sup> *Shanghai Synchrotron Radiation Facility (SSRF), Shanghai Advanced Research Institute, Chinese Academy of Sciences, Shanghai, 201204, China*

\*Corresponding authors.

E-mail addresses: Prof. Yunyan Liu ([liuyunyan@sdut.edu.cn](mailto:liuyunyan@sdut.edu.cn)), Prof. Huiqiang Liu ([liuhq@sdut.edu.cn](mailto:liuhq@sdut.edu.cn)).

## Experimental

### Synthesis of CsPb<sub>2</sub>Br<sub>5</sub> microwires

Preparation of PbBr<sub>2</sub> microwires: All experimental reactions were carried out under air conditions. 20 mg of PbBr<sub>2</sub> powder was dispersed into 10 mL of deionized water and sonicated for 30 min, and then was heated at 150°C for 1 h to prepare a supersaturated aqueous solution. 40 μL of PbBr<sub>2</sub> solution was added dropwise to the substrate and left for 3h to obtain white PbBr<sub>2</sub> microwires.

Synthesis of CsPb<sub>2</sub>Br<sub>5</sub> microwires: The CsBr supersaturated solution was prepared by dissolving 10 mg of CsBr powder in 10 mL of ethanol solution. 40 μL CsBr solution was dropped onto the PbBr<sub>2</sub> microwires to form CsPb<sub>2</sub>Br<sub>5</sub> microwires.

### Photodetector Preparation

The substrates were washed with acetone, ethanol and deionized water. The Ti/Au interdigital electrode were deposited onto the glass substrate using electron beam evaporation to a thickness of 250 nm. The interdigital electrode has a finger length of 2 mm, a finger width of 40 μm and a finger spacing of 65 μm. The interdigital electrode will be kept in Ar at 200 °C for 30 min to reduce the interfacial contact and create a good ohmic contact resistance. The prepared CsPb<sub>2</sub>Br<sub>5</sub> microwire photodetectors were synthesized on Ti/Au coated substrates.

### Characterization of CsPb<sub>2</sub>Br<sub>5</sub>

Field emission transmission electron microscopy (FETEM, Tecnai G2 F20 S-TWIN) and X-ray diffraction (XRD, Bruker AXS D8 ADVANCE) were used to examine the crystallographic composition and the structure of the samples. The absorption spectrum was measured using a UV-3600 Plus spectrophotometer (SHIMADZU). The Raman spectrum was obtained using a scanning probe microscope (Multimode NS3a) with an excitation wavelength of 532 nm. Steady-state photoluminescence (PL) was excited by a 405 nm wavelength light using a spectrometer (PG2000 Pro, Ideaoptics Instruments Co., Ltd.). Wide-angle X-ray scattering (WAXS) images (Mar165CCD) were recorded at the BL16B1 beamline of the Shanghai Synchrotron Radiation Facility (SSRF). Time-resolved fluorescence spectral mapping was carried out using a Nanofinder FLEX2 confocal optical microscope (Tokyo Instrument Inc.). Current–voltage ( $I$ – $V$ ) curves of the CsPb<sub>2</sub>Br<sub>5</sub> microwires were recorded using a source meter (Keithley 2400). The on/off photocurrent ratio was

obtained using an electrochemical workstation (CHI 660E). The optical and electrical features of the prepared photodetectors were investigated at 5 V bias by using 405 nm laser irradiation.

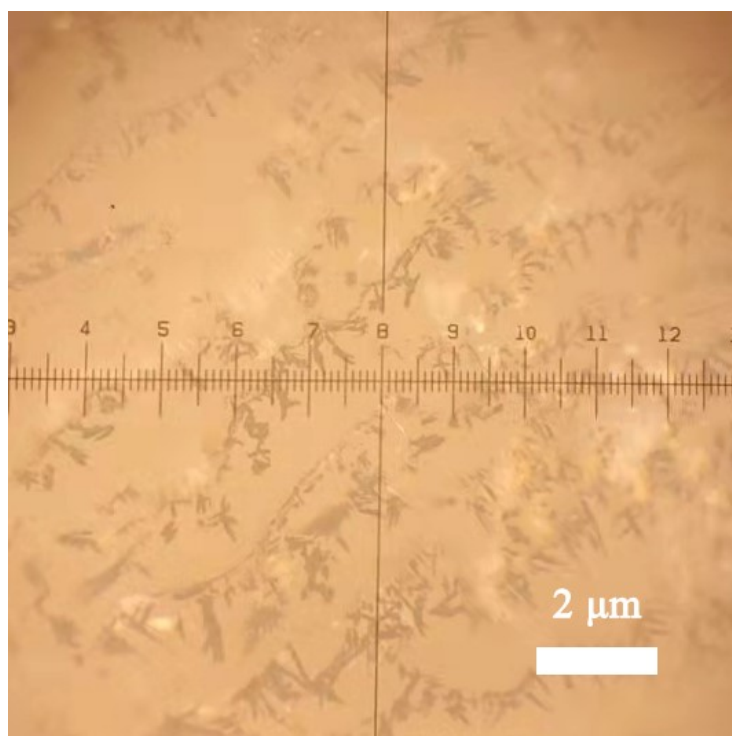

**Fig. S1**  $\text{PbBr}_2$  at the substrate temperature of 60 °C.

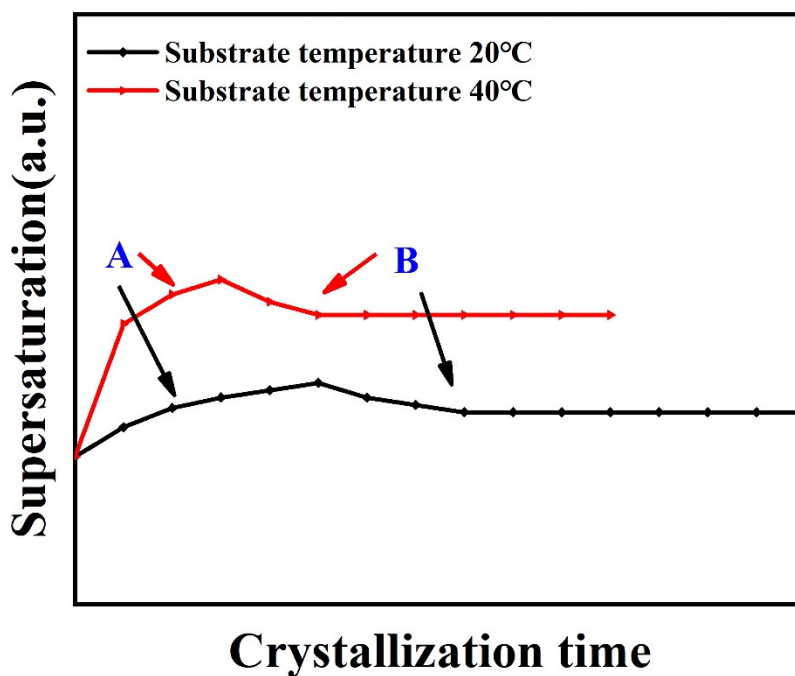

**Fig. S2** Schematic diagram of supersaturation versus growth time when the substrate temperature is 20 °C and 40 °C, respectively.

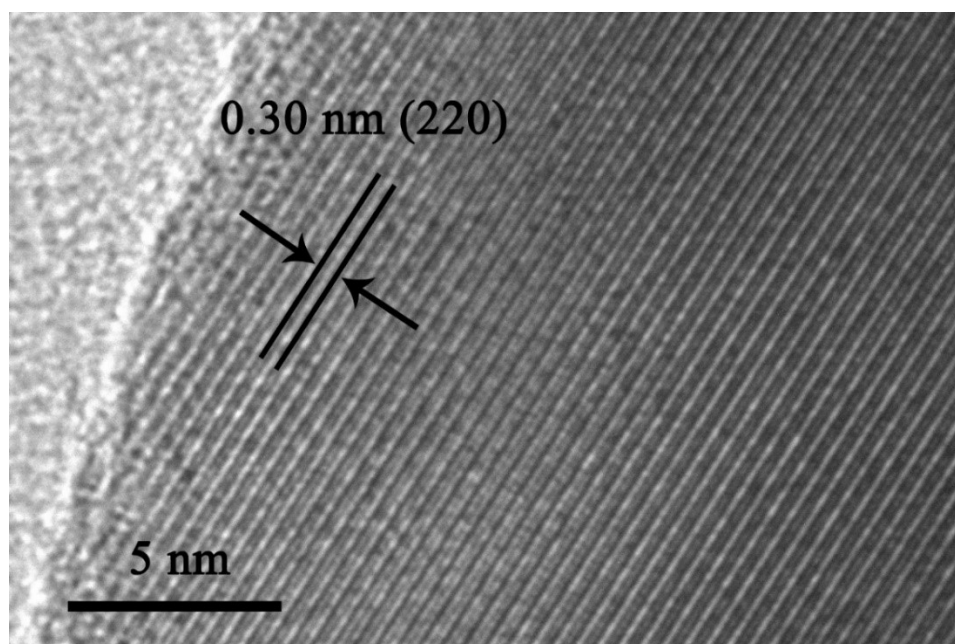

Fig. S3 HRTEM image of the edge of the CsPb<sub>2</sub>Br<sub>5</sub> nanowire.

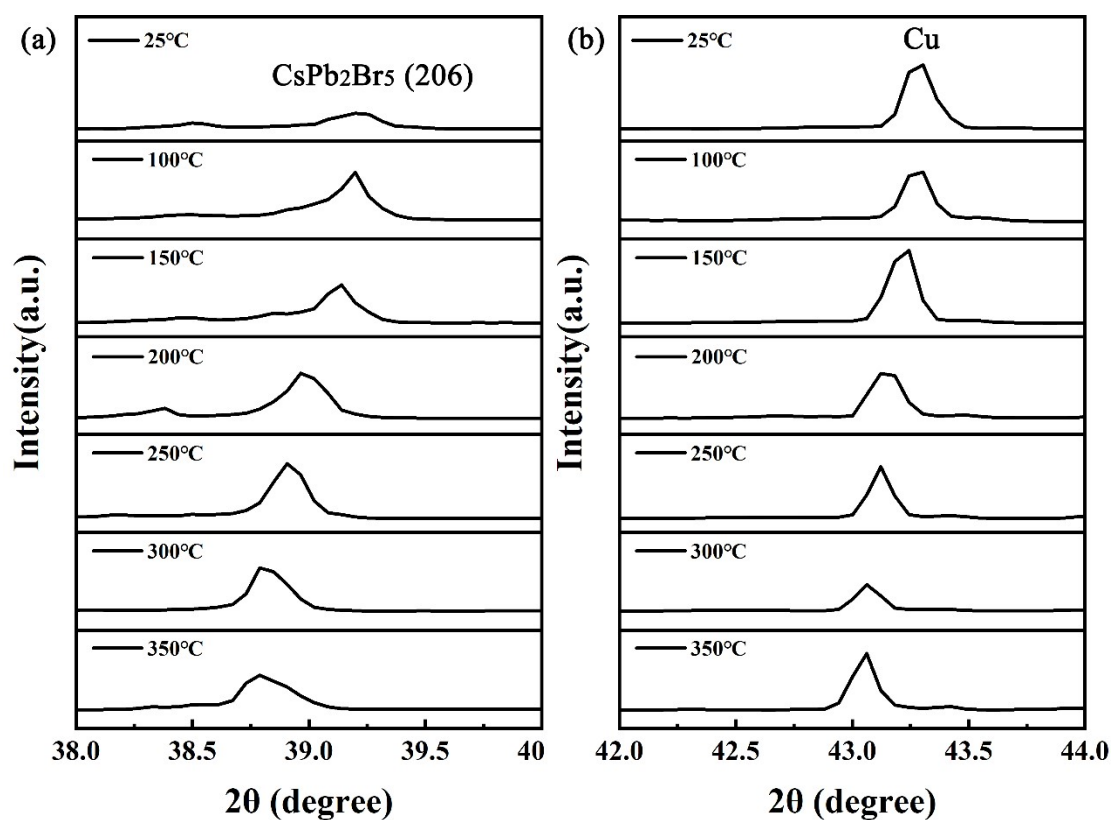

Fig. S4 The enlarged image of the (206) peak of CsPb<sub>2</sub>Br<sub>5</sub> (a), and the Cu substrate diffraction peak (b).

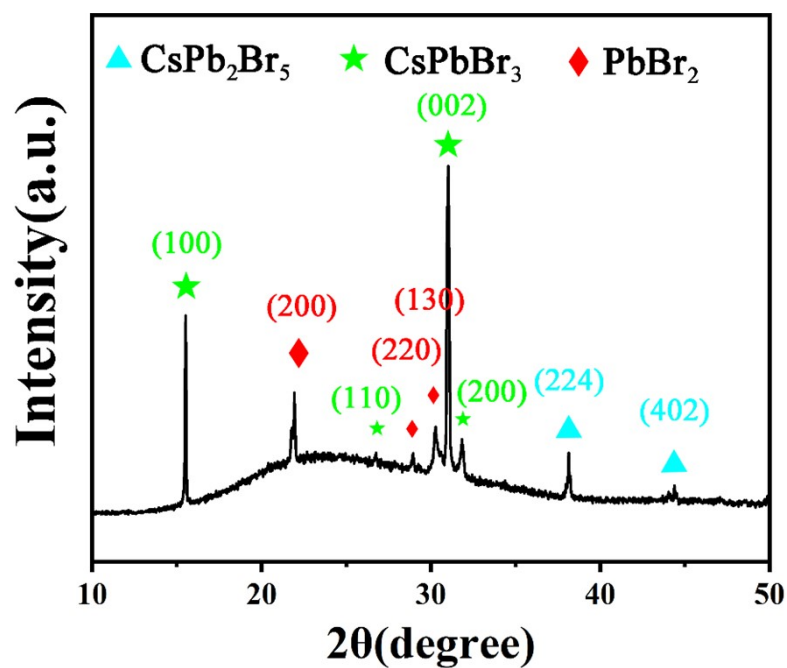

Fig. S5 XRD pattern of CsPb<sub>2</sub>Br<sub>5</sub> microwires annealed at 400 °C in N<sub>2</sub> atmosphere.

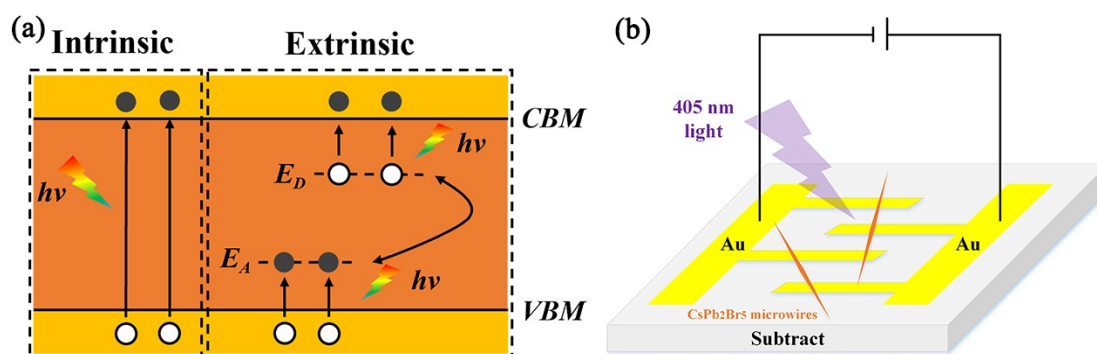

Fig.S6 (a) The diagram of the light absorption and formation of photogenerated carriers of the photoconductive type detector. (b) The test diagram of photoconductive type detector.

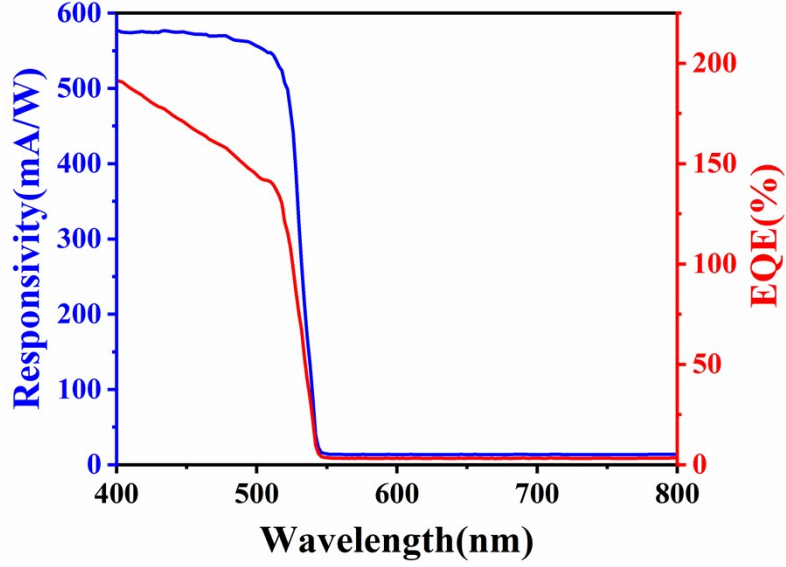

**Fig. S7** The *ca.* R and EQE spectral response of the PD with the wavelengths ranged from 400 to 800 nm with a light intensity of  $4.73 \text{ mW mm}^{-2}$  and a bias voltage of 5 V.

Table S1. Fluorescence decay analysis parameters corresponding to the monitored red area of  $\text{CsPb}_2\text{Br}_5$  microwire in Fig. 6 (e-h) at different temperatures.

|       | $\tau_1(\text{ps})$ | $\tau_2(\text{ps})$ | $\tau_{ave}(\text{ps})$ |
|-------|---------------------|---------------------|-------------------------|
| 25°C  | 899.99(92.19%)      | 4984.5(7.81%)       | 12183                   |
| 150°C | 70.16(56.05%)       | 253.8(43.95%)       | 150.87                  |
| 300°C | 315.74(85.35%)      | 797.9(14.65%)       | 386.38                  |
| 400°C | 472.32(54.6%)       | 2338.7(45.4%)       | 1319.66                 |

Table S2. Comparison of photoelectric performance of different representative lead halide perovskite photodetectors.

|                                                  | rise time(ms) | decay time(ms) | R(mA/W) | D*(Jones)             | [Ref.]    |
|--------------------------------------------------|---------------|----------------|---------|-----------------------|-----------|
| $\text{CsPb}_2\text{Br}_5$ microwires            | 90            | 43             | 640     | $6.07 \times 10^{10}$ | this work |
| $\text{CsPb}_2\text{Br}_5$ nanosheets            | 43            | 85             | 75.4    | $1.33 \times 10^{10}$ | [1]       |
| $\text{CsPb}_2\text{Br}_5$ nano-/micro-sheets    | 180           | 130            | 20      | $10^{12}$             | [2]       |
| $\text{CsPb}_2\text{Br}_5$ flake single crystals | 40            | 120            | 25.1    | --                    | [3]       |
| $\text{CsPbBr}_3$ micro-nanowires                | 301           | 242            | 6440    | $2.88 \times 10^{12}$ | [4]       |
| $\text{CsPbBr}_3$ microwires                     | 275           | 550            | 7660    | $4.05 \times 10^{12}$ | [5]       |
| $\text{CsPbBr}_3$ nanosheets                     | 48            | 18             | 44.9    | $6.4 \times 10^8$     | [6]       |
| $\text{CsPbBr}_3$ crystals                       | 300           | 300            | 2100    | --                    | [7]       |
| MAPbBr <sub>3</sub> milliwires                   | 407           | 895            | --      | --                    | [8]       |
| MAPbBr <sub>3</sub> nanosheets                   | 103           | 87             | 27      | $6.38 \times 10^8$    | [9]       |
| MAPbBr <sub>3</sub> single crystals              | 3500          | 100            | 6.1     | --                    | [10]      |

## Reference

1. R. Wang, Z. Li, S. Li, P. Wang, J. Xiu, G. Wei, H. Liu, N. Jiang, Y. Liu and M. Zhong, *ACS Appl Mater Interfaces*, 2020, **12**, 41919-41931.
2. R. Zhi, J. Hu, S. Yang, C. Perumal Veeramalai, Z. Zhang, M. I. Saleem, M. Sulaman, Y. Tang and B. Zou, *J. Alloys Compd.*, 2020, **824**.
3. Z. Zhang, Y. Zhu, W. Wang, W. Zheng, R. Lin and F. Huang, *Journal of Materials Chemistry C*, 2018, **6**, 446-451.
4. G. Tong, M. Jiang, D. Y. Son, L. Qiu, Z. Liu, L. K. Ono and Y. Qi, *ACS Appl Mater Interfaces*, 2020, **12**, 14185-14194.
5. G. Tong, M. Jiang, D. Y. Son, L. K. Ono and Y. Qi, *Adv. Funct. Mater.*, 2020, **30**.
6. W. Deng, H. Huang, H. Jin, W. Li, X. Chu, D. Xiong, W. Yan, F. Chun, M. Xie, C. Luo, L. Jin, C. Liu, H. Zhang, W. Deng and W. Yang, *Advanced Optical Materials*, 2019, **7**.
7. J. H. Cha, J. H. Han, W. Yin, C. Park, Y. Park, T. K. Ahn, J. H. Cho and D. Y. Jung, *J. Phys. Chem. Lett.*, 2017, **8**, 565-570.
8. F. Chen, C. Xu, Q. Xu, Y. Zhu, F. Qin, W. Zhang, Z. Zhu, W. Liu and Z. Shi, *ACS Appl Mater Interfaces*, 2018, **10**, 25763-25769.
9. M.-M. Liu, L.-L. Zhou, S.-F. Li, F.-X. Liang, Y. Xing, J.-Y. Li, C. Fu, Y.-Z. Zhao, D. Wu and L.-B. Luo, *IEEE Transactions on Electron Devices*, 2022, **69**, 5590-5594.
10. Y. T. Li, G. Y. Gou, L. S. Li, H. Tian, X. Cong, Z. Y. Ju, Y. Tian, X. S. Geng, P. H. Tan, Y. Yang and T. L. Ren, *iScience*, 2018, **7**, 110-119.
